# Supplementary material for: Mono-6-Deoxy-6-Aminopropylamino-β-Cyclodextrin on Ag-Embedded SiO2 Nanoparticle as a Selectively Capturing Ligand to Flavonoids
Source: MDPI journal article supplement (doi:10.3390/nano9101349), 2019-09-20
Supplement: s1 [file s1]

Supporting information

# Mono-6-Deoxy-6-Aminopropylamino- $\beta$ -Cyclodextrin on Ag-Embedded SiO<sub>2</sub> Nanoparticle as a Selectively Capturing Ligand to Flavonoids

Eunil Hahm <sup>1</sup>, Eun Ji Kang <sup>1</sup>, Xuan-Hung Pham <sup>1</sup>, Daham Jeong <sup>1</sup>, Dae Hong Jeong <sup>2</sup>, Seunho Jung <sup>1</sup> and Bong-Hyun Jun <sup>1,\*</sup>

<sup>1</sup> Department of Bioscience and Biotechnology, Konkuk University, Seoul 05029, Korea

<sup>2</sup> Department of Chemistry Education and Center for Educational Research, Seoul National University, Seoul 08826, Korea

\* Correspondence: bjun@konkuk.ac.kr; Tel.: +82-2-450-0521

Received: 11 August 2019; Accepted: 17 September 2019; Published: date

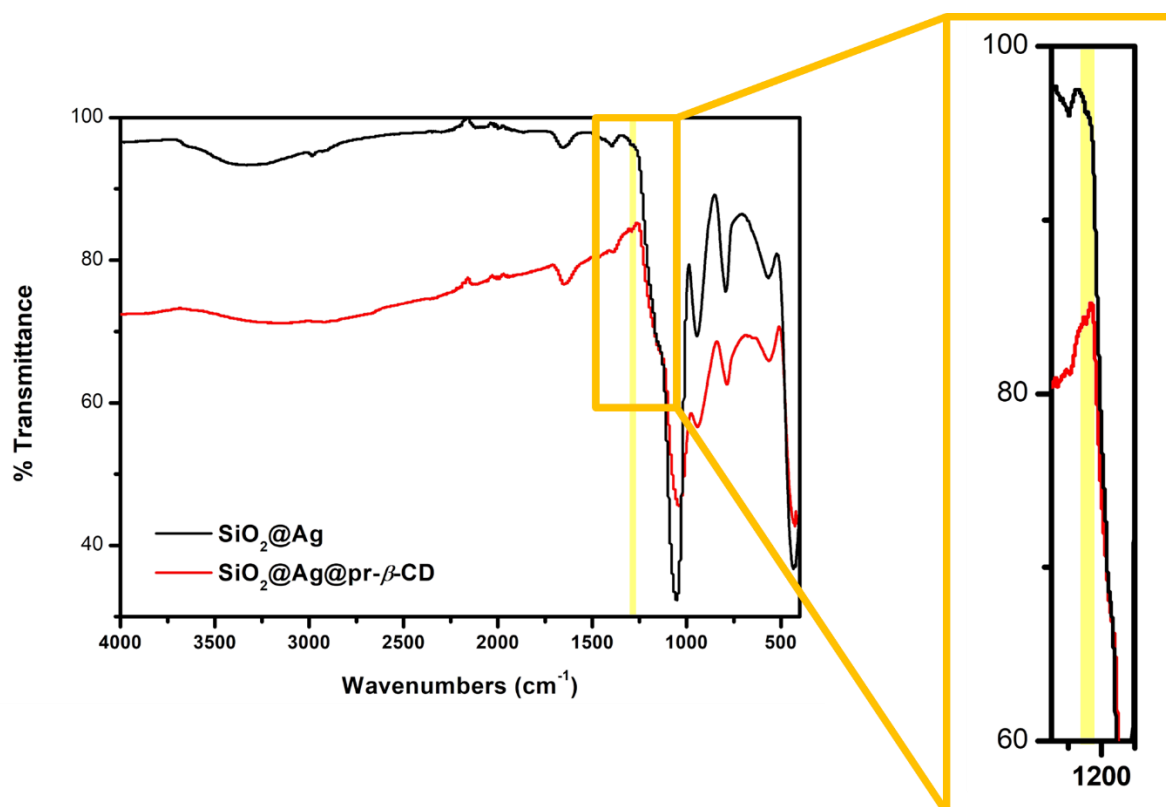

**Figure S1.** ATR-FTIR spectra of SiO<sub>2</sub>@Ag, SiO<sub>2</sub>@Ag@pr- $\beta$ -CD. These materials were measured in a solid state.

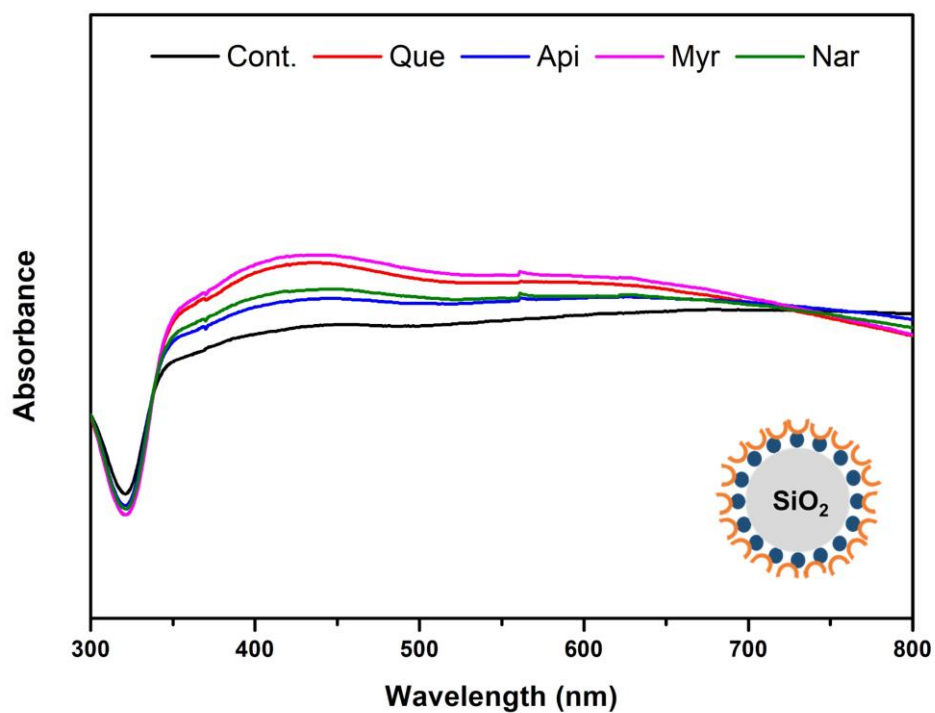

**Figure S2.** UV-visible absorption spectra of  $\text{SiO}_2@\text{Ag}@\text{pr-}\beta\text{-CD}$ -added flavonoids - quercetin (Que), myricetin (Myr), apigenin (Api) and naringenin (Nar).

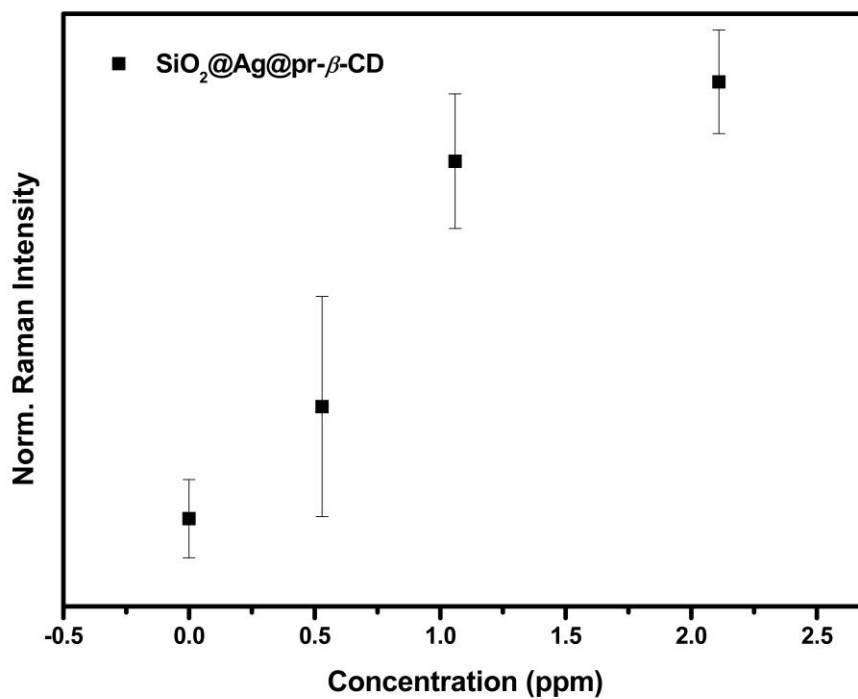

**Figure S3.** Normalized Raman intensity of  $\text{SiO}_2@\text{Ag}@\text{pr-}\beta\text{-CD}$  according to the concentration of quercetin (Que) at  $636\text{ cm}^{-1}$ .
